plus changeante, en vue d'obtenir une carte-base sur laquelle on pointerait périodiquement les variations saisonnières ou extraordinaires. Mais, dans son état actuel la carte de CARRUTHERS sera déjà d'un grand secours à ceux qui cherchent à coordonner les observations parallèles de salinité, de température et de plancton faites au cours d'une période donnée. Elle servira peut-être à faire accepter la notion de la nécessité d'un service permanent international de surveillance de la Mer du Nord, comprenant non seulement des observations de bateaux-phare, mais aussi l'exécution de sections hydrographiques complètes, avec jet de flotteurs de fond et de surface, sur des lignes bien choisies. Parmi celles-ci les sections GRISNEZ-SHAKEPEARE CLIFFS, ZEEBRUGES-ORFORDNESS et HELDER-CROMER, paraissent maintenant s'imposer pour la partie Sud, — le choix de celles de la partie Nord demandant encore des précisions préalables. L'Océanographie pure n'est pas seule à réclamer ces observations suivies: elles sont très nécessaires aux études de Pêcheries et de Météorologie, branches appliquées dont l'importance n'échappe plus même aux mentalités les plus étroitement utilitaires. La prise en considération de ces desiderata sera peut-être un des plus heureux effets du grand effort réalisé par le Ministère de l'Agriculture et des Pêcheries d'Angleterre et dont CARRUTHERS vient d'exposer, avec tant de maîtrise, les principaux résultats.

GILSON.

H. J. BUCHANAN-WOLLASTON. Plaice-Egg Production in 1920—21, treated as a statistical Problem, with Comparison between the Data from 1911, 1914 and 1921. — Fishery Investigations Ser. II. Vol. IX. No. 2. London 1926.

Die Arbeit behandelt das Laichen der Scholle in den Hoofden (Flemish Bight). Es sei zuvor daran erinnert, dass die grosse Bedeutung dieses Laichplatzes schon im ersten Jahrzehnt dieses Jahrhunderts bekannt geworden ist durch mehrere Veröffentlichungen zuerst holländischer, dann auch deutscher Untersuchungen; dabei konnten dank der Hensen'schen quantitativen Methode bereits recht genaue Angaben gemacht werden z. B. über Lage und Umfang des Laichplatzes und dessen Kern am Ostrande der "Tiefen Rinne" in der Region des wärmsten und salzigsten Wassers, sowie über die Dauer der Laichzeit, die im Dezember im Süden des Laichplatzes beginnt, im Januar auf der Höhe ist und Anfang März zu Ende geht.

Diese allgemeinen Erscheinungen fanden Bestätigung durch die englischen Untersuchungen, die in der Laichperiode 1910—11 unter Leitung von BUCHANAN-WOLLASTON in sehr gründlicher Weise aufgenommen wurden. Während bei den früheren Untersuchungen das Gebiet nur auf vereinzelt Fahrten verschiedener Jahre an verhältnismässig wenigen Stationen besucht werden konnte, bedeckte BUCHANAN-WOLLASTON auf mehreren Fahrten während der Haupt-Laichzeit das ganze in Frage kommende Areal gleichmässig mit zahlreichen Stationen, und zwar in den 3 Laichperioden 1910—11, 1913—14 und 1920—21. Die Berichte über die beiden ersten befinden sich in Fishery Investigations Ser. II, Vol. II, No. 4, 1915,

bezw. Vol. V, No. 2, 1923; die letzte betrifft die in der Überschrift genannte Abhandlung. Alle drei Arbeiten müssen im Zusammenhange studiert werden.

Besonders hervorzuheben ist das erfolgreiche Streben nach Vervollkommnung der Methodik sowohl des Fanges selbst als auch besonders der Auswertung und Darstellung der Befunde. Die Fangmethode mit dem Hensen-Netz wurde verbessert durch Einführung der Gegengewicht-Methode, wobei das fischende Netz durch ein sinkendes Gewicht aufgeholt wird zur Vermeidung von Fehlern, die z. B. infolge von Ungleichmässigkeiten des Netzzuges durch Überholen des Schiffes bei schlechtem Wetter oder durch die Bedienungs-Mannschaft oder durch Verstopfung des Netzes entstehen. Der Laichplatz erwies sich als ein in sich abgeschlossenes Gebiet, so dass das Vorkommen der Eimengen durch geschlossene Umriss-Linien dargestellt werden kann, ausserhalb welcher nur so wenige Eier vorhanden sind, dass sie bei Berechnungen als unwesentlich ausser Acht gelassen werden konnten. Damit war es möglich, die Eimenge hier als eine einheitliche, messbare Quantität zu behandeln und die jährliche Produktion zu berechnen, die — wie schon HENSEN gesagt hat — das zuverlässigste Kriterium der Grösse des Fischbestandes ist, der sie hervorbringt, und das am leichtesten erreichbare. Wesentliche Unterschiede in der Grösse der jährlichen Eiproduktion können hier mit einem hohen Mass von Sicherheit festgestellt werden zur Klärung der für wissenschaftliche und praktische Zwecke so überaus wichtigen Frage guter und schlechter Laichjahre und zum Vergleich mit den Fischerei-Ergebnissen in den folgenden Jahren.

Zur Erreichung einer recht vollkommenen Vergleichsmöglichkeit zwischen dem zu verschiedenen Zeiten gewonnenen Tatsachen-Material hat BUCHANAN-WOLLASTON auf die statistische Verarbeitung das Hauptgewicht gelegt und — ganz im HENSEN'schen Sinne — möglichst exakte mathematische Berechnungs- und Darstellungsweisen benutzt bzw. neu erdacht und immer weiter vervollkommenet, die anhangsweise eingehend dargestellt wurden. Diese gründliche Behandlungsweise ist ein grosser Fortschritt, und es muss hervorgehoben werden, dass die Methoden auch für andere Zwecke geeignet sind und daher allgemeine Beachtung verdienen. Für die vorliegenden Untersuchungen dienen die Methoden hauptsächlich zur Berechnung folgender Aufgaben:

1. Umrisslinien für die Regionen bestimmter Eizahlen (junge und alte Eier) pro qm Oberfläche in den verschiedenen Phasen der Laichzeit.
2. Ei-Produktion (Laichintensität, Veränderung derselben im Laufe der Laichzeit, Gesamtproduktion).
3. Feststellung der Lage der Laichzentren.
4. Drift der die Eier enthaltenden Wassermassen.
5. Sterblichkeit der Eier während der Entwicklungszeit.

Zur Hoch-Zeit (etwa Mitte Januar) herrschte alle drei Jahre enge Übereinstimmung in der Position des Laichgebiets, ebenso auch in der Figur der Umrisslinien; weniger Übereinstimmung bestand in der späteren Laichzeit. Mit fortschreitender Jahreszeit bewegt sich der Laichplatz nord- und ostwärts; in allen drei Jahren stimmt diese Bewegung recht

eng mit der Bewegung des starksalzigen und warmen Wassers überein. Der Laichplatz lässt meist zwei Teile erkennen, die durch eine Barre in der "Tiefen Rinne" auf der Breite von Southwold getrennt sind; das seichtere Wasser darüber ist oft weniger warm und salzhaltig. Für 1914, das sich nach dem 2. Bericht bei Anwesenheit einer viel grösseren Menge stark salzigen Wassers in den Hoofden als bedeutend besseres Laichjahr als 1911 erwies, wurde folgende Ei-Produktion berechnet: Januar im Laichzentrum ca. 48 Eier pro qm. in 3 Tagen, Februar desgl. im südlichen Zentrum 36, im nördlichen 39 pro qm. Anzahl der im ganzen Gebiet in 3 Tagen produzierten Eier: Januar annähernd 180,000 Millionen, Februar 157,000 Millionen. Monatliche Produktion rund 2,000,000 Millionen, Totalproduktion des Jahres vermutlich wenigstens 5,000,000 Millionen Stück. Um diese Menge hervorzubringen, müssen etwa 20 Millionen weibliche Schollen und wenigstens ebenso viele Männchen auf diesem Grunde gelaicht haben.

1921 war die Eiproduktion nahezu zweimal so gross als 1914, auch hatte das Verbreitungsgebiet der Eier eine viel grössere Ausdehnung. Im Vergleich zum schlechten Laichjahr 1911 war die Produktion von 1921 drei bis viermal so gross. Dies wichtigste Ergebnis von allgemeinem Interesse steht also im Einklang mit den übrigen Feststellungen über die Vergrösserung des Schollenbestandes in der Nordsee nach dem Kriege, auch mit den deutschen Befunden über die Eimengen in der Laichperiode 1919—20.

Aus Reife- und Geschlechtsbestimmungen getrawlter Schollen geht hervor, dass sie den Laichgründen entlang der Ostseite der "Tiefen Rinne" zustreben und sie auf der Westseite verlassen, wo entlang der englischen Küste eine südlich gerichtete Strömung streicht, so dass die Laichwanderung gegen den Strom geht. Wie schon früher beobachtet, waren die Fänge auf den Laichgründen durch eine grosse Zahl von fliessenden Männchen charakterisiert, während sich die Weibchen hier mit dem Trawl nicht fangen lassen, nach Ansicht von BUCHANAN-WOLLASTON wahrscheinlich wegen der Geschwindigkeit, mit der sie ihren Laich abgeben.

Die Verteilung der Eier nach der Ablage wurde gewöhnlich recht gleichmässig in allen Wassertiefen und nicht an der Oberfläche angesammelt gefunden. Während der Entwicklung breiten sich die Eier über ein grösser werdendes Gebiet aus, ein Teil wird mit der Oberflächenströmung fortgetrieben, andre bleiben zurück und folgen langsam in tieferen Lagen, andere können vielleicht in entgegengesetzte Richtungen vertrieben werden. Es scheint eine linksdrehende Wirbelbewegung in der Mittelschicht vorhanden zu sein, welche die Eier nördlich in das tiefe Wasser gegenüber von Lowestoft zu versetzen strebt. Das zum Laichen gewählte möglichst starksalzige und warme Wasser kann an Stellen vorkommen, die für das Fortkommen der Brut ungeeignet erscheinen; ein grosser Teil der Eier kann trotz einer günstigen Oberflächen-Drift unterhalb derselben in vielleicht sehr ungünstige Gegenden vertrieben werden. (Diese Verhältnisse sollen aufgeklärt werden durch Untersuchung der schlecht bekannten Verbreitung der postlarvalen und ersten Bodenstadien.)

Die allgemeine Drift der Eier über dem Laichplatz — abgesehen natürlich von dem Hin und Her der Tide — konnte BUCHANAN-WOLLASTON nach

Richtung und Schnelligkeit berechnen, indem er Schwerpunktszentren bestimmte für die Verbreitungsgebiete der zu einer gewissen Zeit abgelegten Eier in ihren allerersten Entwicklungsstadien und derselben Eier in den Stadien kurz vor dem Ausschlüpfen (Zeitraum von ca. 2 Wochen unter Berücksichtigung der Entwicklungsdauer nach Tagesgraden n. APSTEIN). Die Entfernung zwischen den beiden Schwerpunktszentren ergibt die Drift, die in allen untersuchten Fällen nordöstlich gerichtet war und in 12 Tagen zwischen 18 und 37 Meilen betrug. Eine Messung der Bewegung der gesamten Wassermasse mittels der Fischeier, die mit Millionen von Treibflaschen nicht vollendeter erreicht werden könnte!

Die Verfrachtung der Eier geschieht also ziemlich langsam. Schon im 1. Bericht gelangte BUCHANAN-WOLLASTON zu der Vorstellung einer nur schwachen restlichen Drift nach Norden, da die grössten Larven-Zahlen in der Regel mit den grössten Eier-Zahlen zugleich gefunden werden, dabei aber mehr Larven vorkommen nordwärts als südwärts vom Laichzentrum. Falls die Annahme richtig ist, dass dieser Laichplatz die südöstlichen Küsten der Nordsee mit Jungschollen versorgt, so muss jedenfalls der grösste Teil der Reise von den jungen Fischen nach Vollen- dung ihres pelagischen Lebens gemacht werden.

Die Sterblichkeit der Eier während ihrer Entwicklung ist hoch; nach den Berechnungen des 2. Berichts gelangen wahrscheinlich nur 10—30 % der Eier zum Ausschlüpfen.

Zum Schluss möchte der Referent die Ausführungen am Ende des 2. Berichtes über die Bedeutung der quantitativen Eier-Untersuchungen für praktische Fischereiaufgaben unterstreichen und die regelmässige Fort- setzung dieser Beobachtungen dringend empfehlen, ausserdem ihre Erwei- terung auf die übrigen Laichplätze der Nordsee — zwecks Vergleichbar- keit überall nach den gleichen Fangmethoden! M.
